# Supplementary material for: Effects of amino acid additives on protein solubility – insights from desorption and direct electrospray ionization mass spectrometry
Source: Royal Society of Chemistry journal article supplement (doi:10.1039/d1an01392k), 2021-01-01
Supplement: d1an01392k1.pdf [file d1an01392k1.pdf]

## Supporting Information

Roshan Javanshad, Andre R. Venter\*

Department of Chemistry, Western Michigan University, Kalamazoo, MI 49008-5413

\*Corresponding author: Andre Venter, Department of Chemistry, Western Michigan University, Kalamazoo, MI, 49008-5413, +1-269-387-2420, [andre.venter@wmich.edu](mailto:andre.venter@wmich.edu)

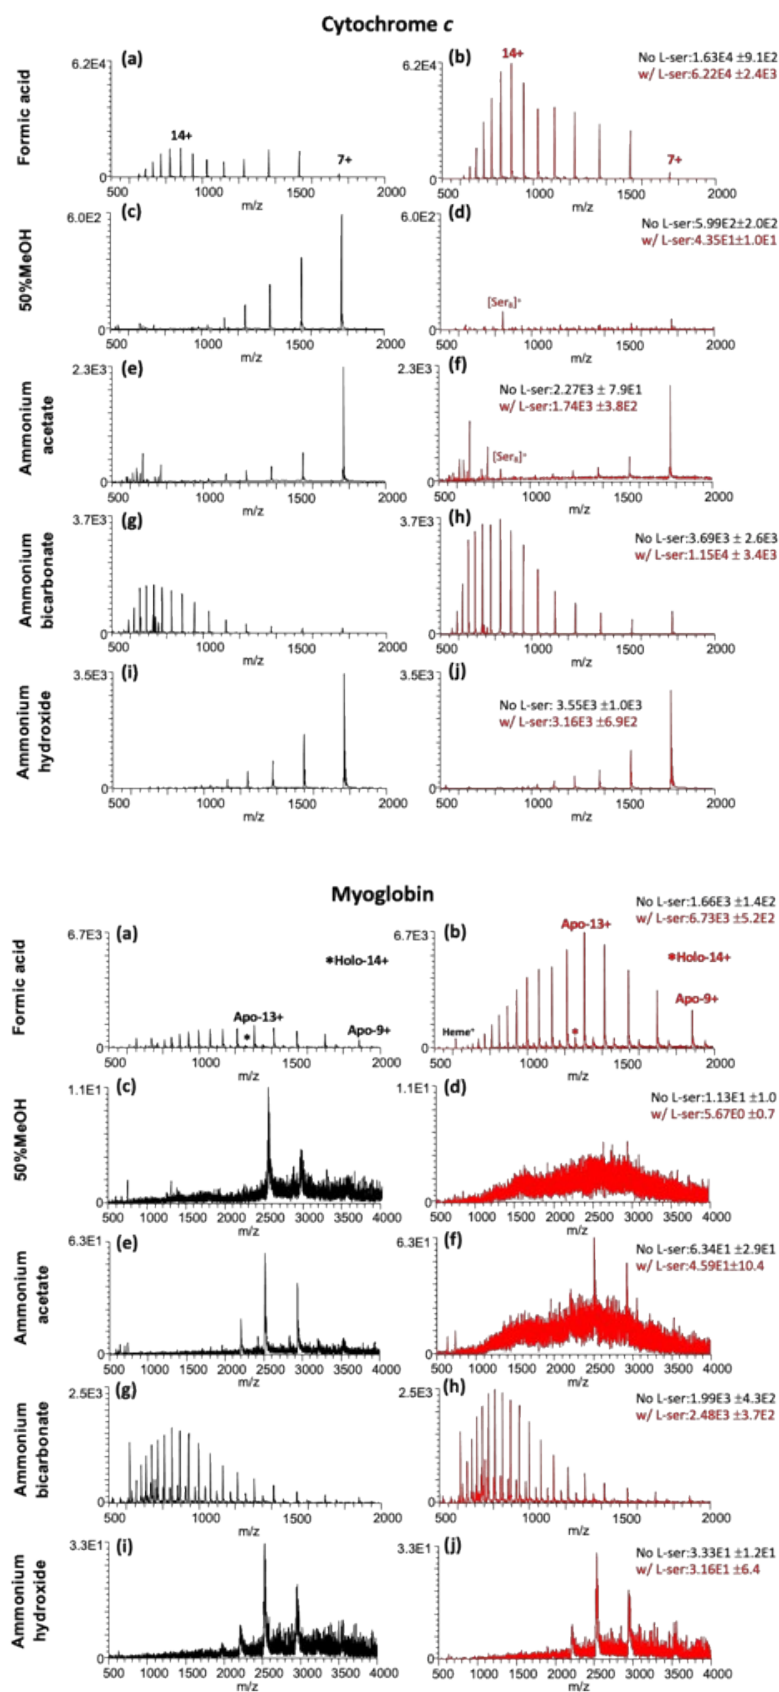

**Figure S1.** Representative DESI-MS spectra of natively deposited cytochrome *c* and myoglobin analyzed with five different desorption solvent systems with 100  $\mu$ M L-serine (shown in red) and without it (shown in black) arranged by increasing desorption solvent pH. (a), (b) 0.1% formic acid in 50% MeOH. (c), (d) 50% MeOH. (e), (f) 200 mM ammonium acetate in 50% MeOH. (g), (h) 200 mM ammonium bicarbonate in 50% MeOH. (i), (j) 1% ammonium hydroxide in 50% MeOH. The intensities reported are the average intensity of the highest observed charge state (HICS) of the protein in each solvent system with L-serine (in red) and without it (in black). Statistically significant improvement in signal intensity were observed for cytochrome *c* (b) and (h) and myoglobin (b) (p-value<0.001).

**Table S1-** Improvement in signal intensity for each protein with addition of L-serine to the five different solvent systems.

|                             | pH    | Average fold change<br>Cyt c<br>HICS Intensity | Average fold change<br>Cyt c<br>Integrated Intensity | Average fold change<br>apo-Myo<br>HICS Intensity | Average fold change<br>Apo-myo<br>Integrated Intensity | Average fold change<br>holo-Myo<br>HICS Intensity | Average fold change<br>Holo-myo<br>Integrated Intensity |
|-----------------------------|-------|------------------------------------------------|------------------------------------------------------|--------------------------------------------------|--------------------------------------------------------|---------------------------------------------------|---------------------------------------------------------|
| <b>Formic acid</b>          | 2.99  | 3.8±0.1                                        | 3.1±0.4                                              | 4.3± 0.3                                         | 3.7± 0.2                                               | 3.5± 0.3                                          | 3.31±0.3                                                |
| <b>50% MeOH</b>             | 5.75  | 0.1± 0.02                                      | 0.4±0.02                                             | N/A                                              | N/A                                                    | 0.5± 0.05                                         | N/A                                                     |
| <b>Ammonium acetate</b>     | 7.32  | 0.8± 0.2                                       | 0.7±0.1                                              | N/A                                              | N/A                                                    | 0.7±0.2                                           | N/A                                                     |
| <b>Ammonium bicarbonate</b> | 7.97  | 3.1± 0.2                                       | 3.1±0.3                                              | 1.4± 0.2                                         | 1.2± 0.2                                               | 1.3± 0.2                                          | 1.3± 0.2                                                |
| <b>Ammonium hydroxide</b>   | 10.02 | 0.9± 0.2                                       | 0.8±0.2                                              | N/A                                              | N/A                                                    | 0.9± 0.2                                          | N/A                                                     |

**Table S2.** Approximate net charge on protein and serine in different solvent systems.

| <b>Cytochrome c</b>  |                              |            |                                     |                                      |                                  |                                  |
|----------------------|------------------------------|------------|-------------------------------------|--------------------------------------|----------------------------------|----------------------------------|
| <b>Solvent</b>       | <b>Intensity Fold Change</b> | <b>≈pH</b> | <b>Protein Net Charge (pI 10.3)</b> | <b>Serine Population</b>             | <b>pH-pK<sub>a1</sub> (2.21)</b> | <b>pH-pK<sub>a2</sub> (9.15)</b> |
| Formic acid          | 3.1                          | 3          | +                                   | 60-70% zwitterion<br>30-40% positive | 0.79                             |                                  |
| 50% MeOH             | 0.8                          | 6          | +                                   | 100% zwitterion                      | 3.79                             |                                  |
| Ammonium acetate     | 0.8                          | 7          | +                                   | 99% zwitterion<br>1% negative        |                                  | -2.15                            |
| Ammonium bicarbonate | 3.1                          | 8          | +                                   | 92-94% zwitterion<br>6-8% negative   |                                  | -1.15                            |
| Ammonium hydroxide   | 0.9                          | 10         | -                                   | 10-20% zwitterion<br>80-90% negative |                                  | 0.85                             |

| <b>Myoglobin</b>     |                              |            |                                    |                                      |                                  |                                  |
|----------------------|------------------------------|------------|------------------------------------|--------------------------------------|----------------------------------|----------------------------------|
| <b>Solvent</b>       | <b>Intensity Fold Change</b> | <b>≈pH</b> | <b>Protein Net Charge (pI 7.4)</b> | <b>Serine Population</b>             | <b>pH-pK<sub>a1</sub> (2.21)</b> | <b>pH-pK<sub>a2</sub> (9.15)</b> |
| Formic acid          | 3.7                          | 3          | +                                  | 60-70% zwitterion<br>30-40% positive | 0.79                             |                                  |
| 50% MeOH             | 0.5                          | 6          | +                                  | 100% zwitterion                      | 3.79                             |                                  |
| Ammonium acetate     | 0.7                          | 7          | -                                  | 99% zwitterion<br>1% negative        |                                  | -2.15                            |
| Ammonium bicarbonate | 1.2                          | 8          | -                                  | 92-94% zwitterion<br>6-8% negative   |                                  | -1.15                            |
| Ammonium hydroxide   | 0.9                          | 10         | -                                  | 10-20% zwitterion<br>80-90% negative |                                  | 0.85                             |

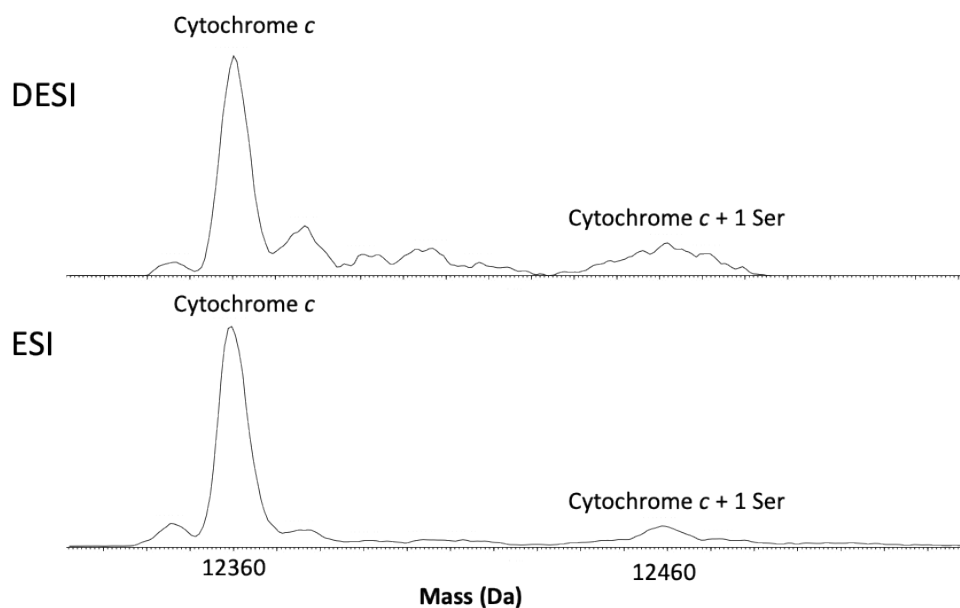

**Figure S2.** Representative deconvoluted spectra of cytochrome *c* shows presence of L-serine adducts on cytochrome *c* peaks that were detected at low temperature (70°C) in DESI and ESI with 0.1% formic acid in 50% MeOH with 100  $\mu$ M L-serine as desorption solution and working solution respectively.
